# Supplementary material
Source: publisher figshare collection journal article supplement (https://acs.figshare.com/ndownloader/files/11406485)
Supplement: Supplementary file 1 [file 11406485]

## Supporting Information

# Modified Floating Electrode-Based Sensors for the Quantitative Monitoring of Drug Effects on Cytokine Levels Related with Inflammatory Bowel Diseases

Viet Anh Pham Ba<sup>†</sup>, Yoo Min Han<sup>‡</sup>, Youngtak Cho<sup>†</sup>, Taewan Kim<sup>§</sup>, Byung Yang Lee<sup>\*,§</sup>, Joo Sung Kim<sup>\*,‡,||</sup>, Seunghun Hong<sup>\*,†,⊥</sup>

<sup>†</sup>Department of Physics and Astronomy and Institute of Applied Physics and <sup>⊥</sup>Department of Biophysics and Chemical Biology, Seoul National University, Seoul 08826, Korea

<sup>‡</sup>Department of Internal Medicine and Liver Research Institute, Seoul National University College of Medicine, Seoul 03080, Korea

<sup>§</sup>Department of Mechanical Engineering, Korea University, Seoul 02841, Korea

<sup>||</sup>Department of Internal Medicine and Liver Research Institute, Seoul National University College of Medicine, Seoul 03080, Korea

To whom correspondence should be addressed. E-mail: blee@korea.ac.kr (B.Y.L.), jooskim@snu.ac.kr (J.S.K.), seunghun@snu.ac.kr (S.H.)

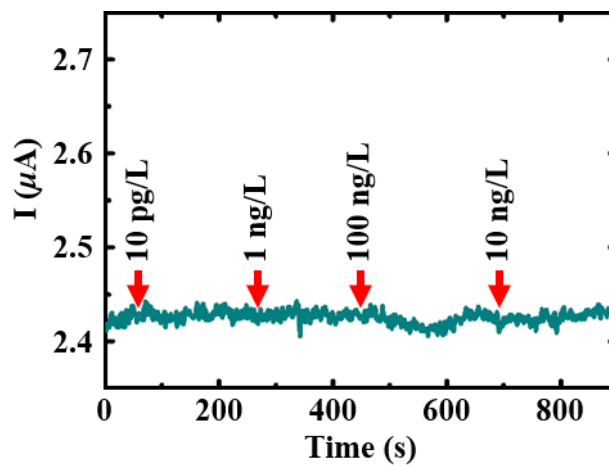

**Figure S1.** Real-time electrical current measurement of a CNT-FET sensor with pristine floating electrodes in response to the addition of various TNF- $\alpha$  concentrations. There is no significant effect on the currents in the sensor caused by TNF- $\alpha$  solutions.

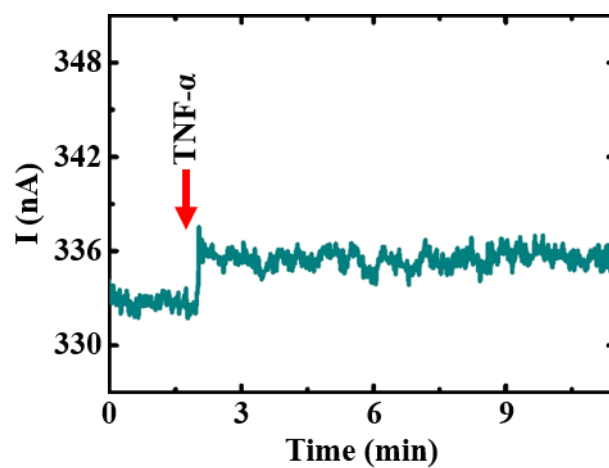

**Figure S2.** Real-time electrical current measurement of a TNF sensor for 10 min. The electrical currents in the sensor increased and gradually stabilized after the addition of  $1\ \mu\text{g/L}$  TNF- $\alpha$  solution. This result implies the long-term stability of the signal of TNF sensors.
